# Supplementary material for: Do the discrete dianions C2B9H112− exist? Characterisation of alkali metal salts of the 11-vertex nido dicarboranes, C2B9H112−, in solution
Source: Royal Society of Chemistry journal article supplement (doi:10.1039/b109804g), 2002-01-01
Supplement: b109804g.doc [file b109804g.doc]

Supplementary material for the paper:

**Do the discrete dianions C2B9H112- exist? Characterisation of alkali metal salts of the 11-vertex *nido* dicarboranes, C2B9H112-, in solution****.**

Mark A. Fox,* Andrew K. Hughes,* Andrew L. Johnson and Michael A. J. Paterson

Chemistry Department, Durham University Science Laboratories, South Road,
 Durham, UK DH1 3LE.

Comprising:

Table 1. Bond lengths of the optimised model geometries **H** and **I** and of the experimental geometries **10** and **11**.

Figure 1. The 96.2 MHz 11B-11B COSY spectrum of Li27,9-C2B9H11 **4** in THF / 10%C6D6.

Table 2. Observed (in bold) and computed (GIAO-6-311G*//MP2/6-31G*) NMR data for 7,8-Me2-7,8-C2B9H10-

Table 3. Cartesian coordinates for MP2/6-31G* geometry of 7,8-Me2-7,8-C2B9H10-

Table 1. Bond lengths of the optimised model geometries **H** and **I** and of the experimental geometries **10** and **11**.

|  | **H** | **10** | **I** | **11** |
| --- | --- | --- | --- | --- |
| B1-C2 | 1.684 | 1.711(6) | 1.688 | 1.705(7) |
| B1-C3 | 1.700 | 1.702(6) |  |  |
| B1-B3 |  |  | 1.783 | 1.771(8) |
| B1-B4 | 1.798 | 1.787(8) |  |  |
| B1-C4 |  |  | 1.690 | 1.708(7) |
| B1-B5 | 1.809 | 1.800(8) | 1.794 | 1.767(8) |
| B1-B6 | 1.801 | 1.799(8) | 1.789 | 1.760(8) |
| C2-C3 | 1.490 | 1.509(6) |  |  |
| C2-B3 |  |  | 1.555 | 1.548(7) |
| C3-B4 | 1.561 | 1.560(6) |  |  |
| B3-C4 |  |  | 1.555 | 1.528(7) |
| B4-B5 | 1.657 | 1.637(7) |  |  |
| C4-B5 |  |  | 1.567 | 1.566(7) |
| B5-B6 | 1.668 | 1.637(7) | 1.664 | 1.626(8) |
| C2-B6 | 1.556 | 1.559(6) | 1.567 | 1.560(7) |
| *ap-*Li-C2 | 2.316 | 2.367(9) | 2.326 | 2.295(9) |
| *ap-*Li-C3 | 2.269 | 2.295(9) |  |  |
| *ap-*Li-B3 |  |  | 2.337 | 2.318(10) |
| *ap-*Li-B4 | 2.342 | 2.291(9) |  |  |
| *ap-*Li-C4 |  |  | 2.350 | 2.374(9) |
| *ap-*Li-B5 | 2.415 | 2.371(9) | 2.328 | 2.344(9) |
| *ap-*Li-B6 | 2.357 | 2.337(10) | 2.318 | 2.299(10) |
| *exo-*Li-B5 | 2.240 | 2.226(9) | 2.252 | 2.215(10) |
| *exo-*Li-B6 | 2.193 | 2.241(8) | 2.213 | 2.234(9) |
| *ap-*Li-N | 2.124 | 2.192(9) | 2.122 | 2.160(9) |
| *ap-*Li-N | 2.144 | 2.159(9) | 2.135 | 2.151(9) |


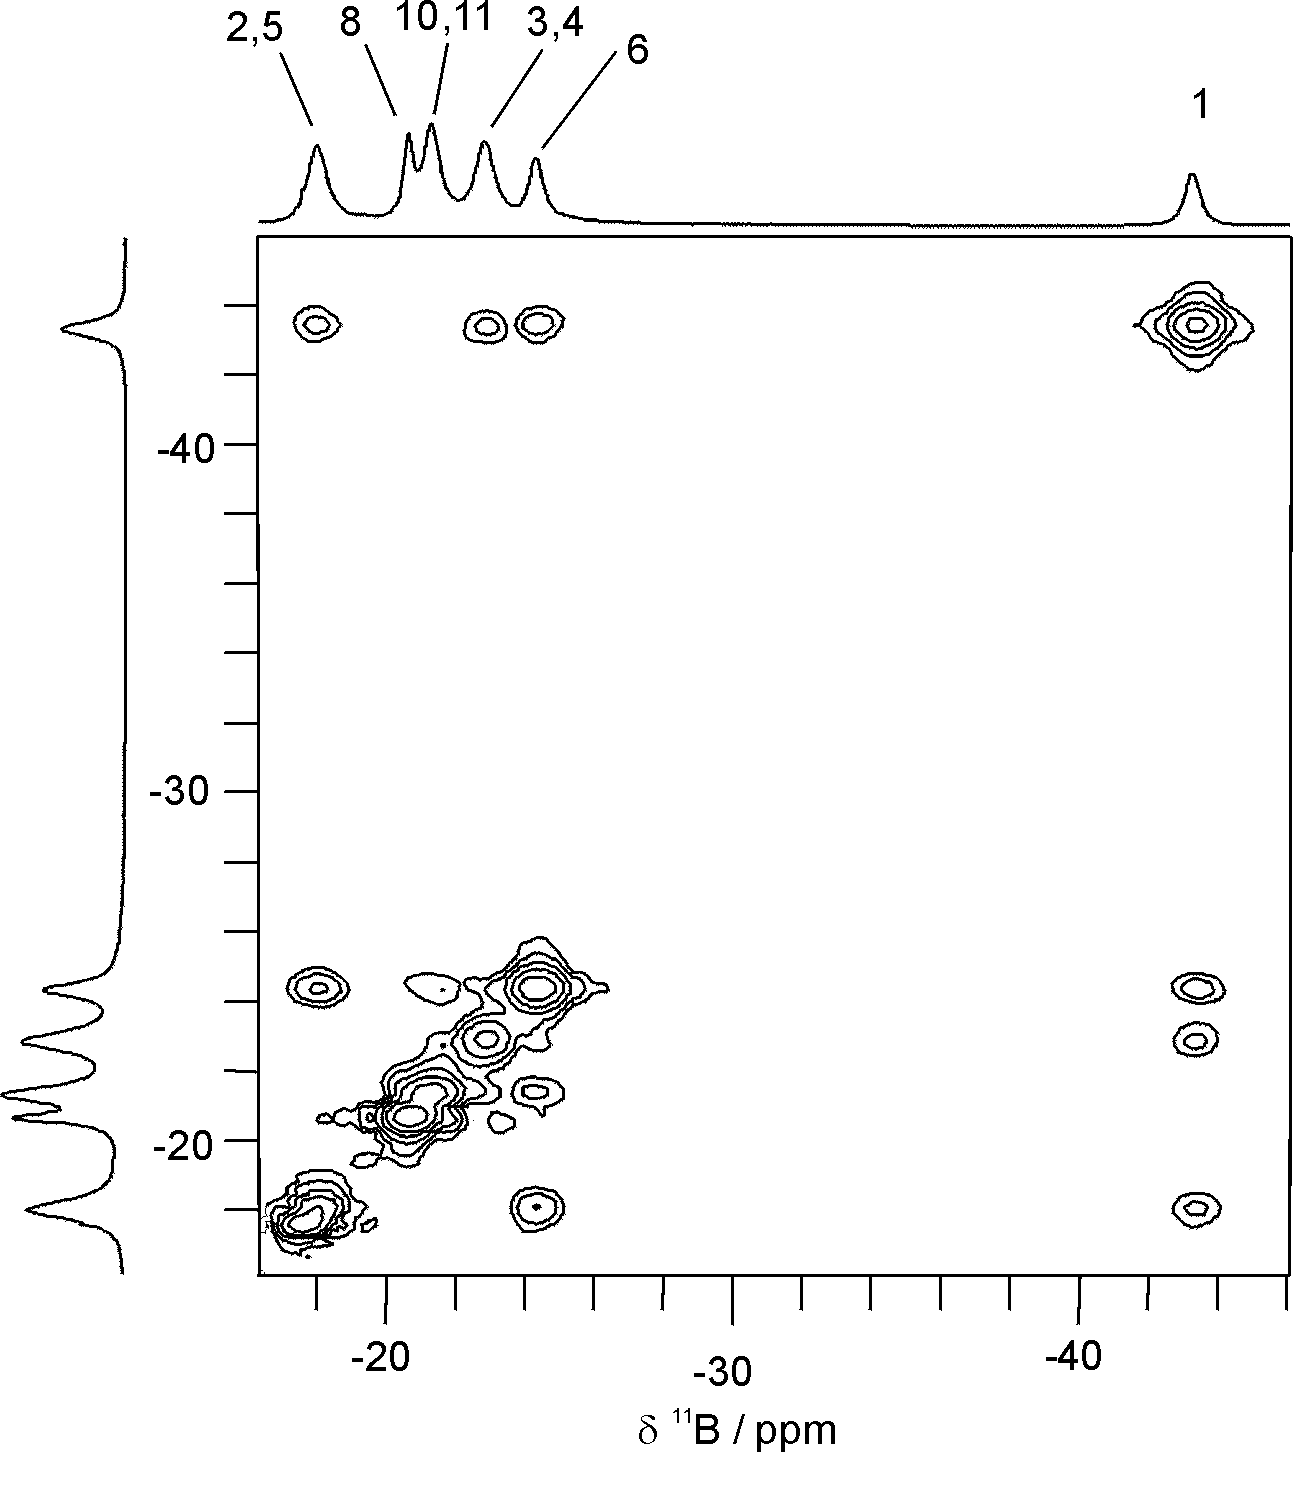


Figure 1. The 96.2 MHz 11B-11B COSY spectrum of Li27,9-C2B9H11 **4** in THF / 10%C6D6.

Table 2. Observed (in bold) and computed (GIAO-6-311G*//MP2/6-31G*) NMR data for 7,8-Me2-7,8-C2B9H10-

11B and 13C NMR

| **(HNMe3)(7,8-Me2-7,8-C2B9H10)**  **in CD3CN** | **-9.2**  **(B3)** | **-9.2**  **(B9,11)** | **-18.4**  **(B5,6)** | **-18.4**  **(B2,4)** | **-34.9**  **(B10)** | **-36.9**  **(B1)** | **57.3**  **(C7,8)** | **22.1**  **(CH3)** |
| --- | --- | --- | --- | --- | --- | --- | --- | --- |
| 7,8-Me2-7,8-C2B9H10- | -10.1  (B3) | -12.0[[1]](#footnote-2)  (B9,11) | -17.7Error: Reference source not found  (B5,6) | -18.5Error: Reference source not found  (B2,4) | -35.5  (B10) | -37.7  (B1) | 60.0  (C7,8) | 24.9  (CH3) |

1H NMR

| **(HNMe3)**  **(7,8-Me2-7,8-C2B9H10)**  **in CD3CN** | **1.82**  **(B9,11H)** | **1.46**  **(B3H)** | **1.34**  **(B2,4H?)** | **1.34**  **(CH3)** | **1.03**  **(B5,6H?)** | **0.36**  **(B1H)** | **-0.13**  **(B10)** | **-2.68**  **(H)** |
| --- | --- | --- | --- | --- | --- | --- | --- | --- |
| 7,8-Me2-7,8-C2B9H10- | 2.26  (B9,11H) | 2.06  (B3H) | 1.97  (B2,4H) | 1.35  (CH3) | 1.79  (B5,6H) | 0.97  (B1H) | 0.49  (B10H) | -2.97  (H) |

Table 3. Cartesian coordinates for MP2/6-31G* geometry of 7,8-Me2-7,8-C2B9H10-

29

C4H16B9(1-) << C1 >>

C -0.768561 0.796778 -0.155134

C -0.829320 -0.768339 -0.124023

B 0.513629 1.426570 -0.910071

B 0.480633 1.415494 0.864565

B -0.441500 0.004044 1.349137

B 0.421519 -1.396429 -0.969340

B 1.472526 0.018313 -1.492684

B 1.902706 0.874363 0.003796

B 1.318908 -0.047942 1.418069

B 0.413510 -1.425337 0.833400

B 1.870005 -0.938479 -0.042345

C -2.095163 1.533834 -0.236305

C -2.185880 -1.447086 -0.179479

H 0.434678 2.501369 -1.441361

H 0.326686 2.418898 1.498962

H -1.255902 0.010413 2.224695

H 0.328742 -2.458590 -1.520707

H 2.250949 -0.024934 -2.403207

H 2.948886 1.459348 0.019808

H 1.912002 -0.092513 2.455557

H 0.230678 -2.470496 1.386698

H 2.863745 -1.604986 -0.000149

H -2.781335 1.273741 0.577261

H -1.906279 2.609900 -0.195026

H -2.594412 1.318530 -1.188771

H -2.695612 -1.218208 -1.123134

H -2.043190 -2.530455 -0.131497

H -2.843246 -1.153213 0.645868

H 0.337474 -0.382920 -1.907985

1. Computed shifts averaged. [↑](#footnote-ref-2)
